# Supplementary material
Source: Springer Nature journal article supplement (https://www.springermedizin.de/resource/supplementary/12955_2012_1015_MOESM3_ESM.pdf/9558834)

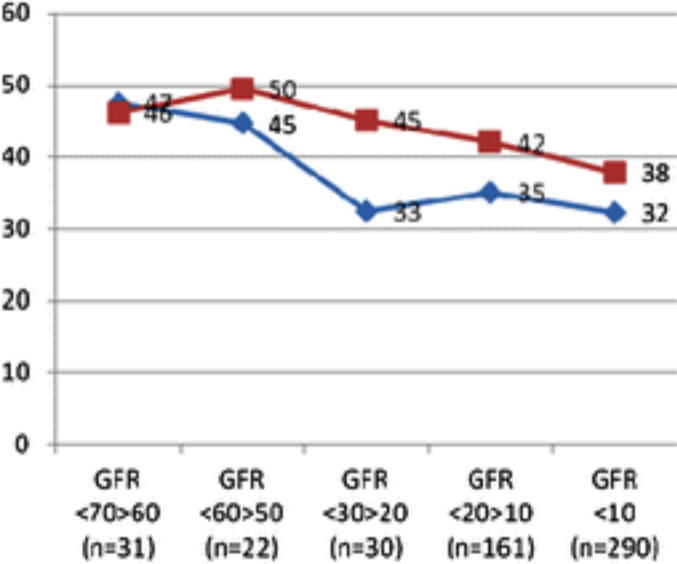

—◆— PCS scores (M)  
—■— MCS scores (M)

Supplement: MOESM3 [file 9558834]
